# Supplementary material
Source: PubMed Central journal article supplement (PMC11348864)
Supplement: freeneuropathol-05-18-5269-s1.pdf [file freeneuropathol-05-18-5269-s1.pdf]

## Supplementary material

### Supplementary Figure 1

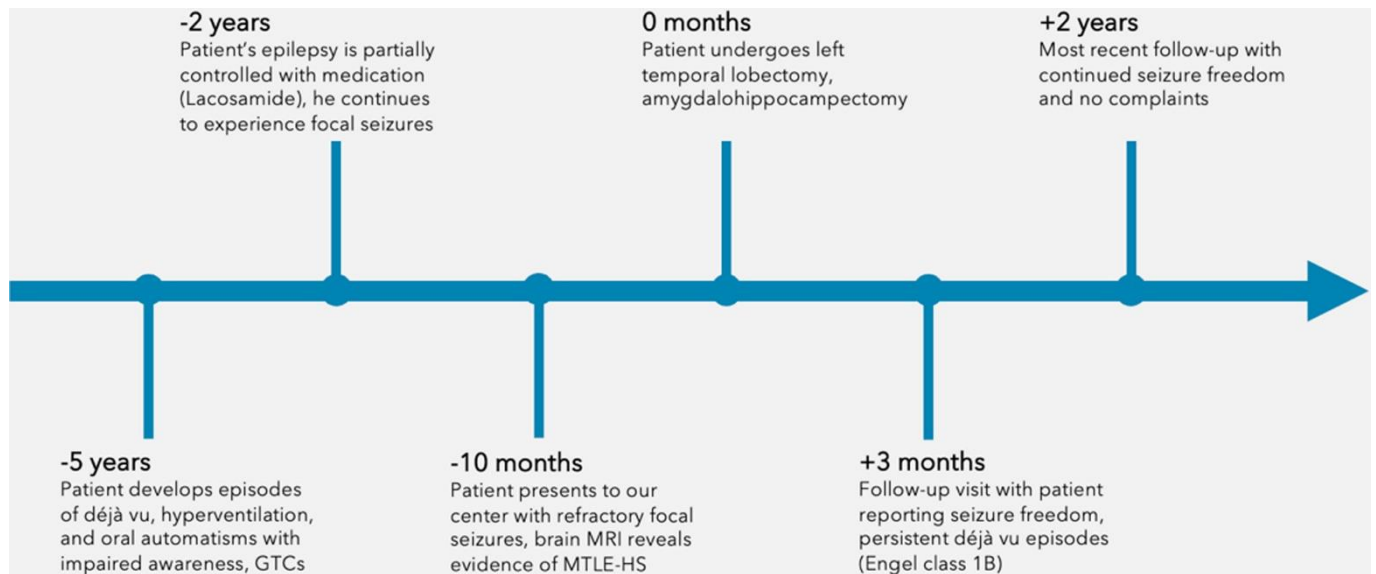

Supplementary Figure 1. Timeline of patient care.
